# Supplementary material for: Exploring the relationship between temperature forecast errors and Earth system variables
Source: Copernicus journal article supplement (doi:10.5194/esd-13-1451-2022), 2022-10-28
Supplement: Supplementary file 1 [file esd-13-1451-2022-supplement.zip]

|  |                         |          |           |          |           |          |          |           |           |       |        |        |         |          |           |                        |       |       |       |       |       |       |       |       |       |       |       |       |       |       |       |       |       |       |       |       |       |
|--|-------------------------|----------|-----------|----------|-----------|----------|----------|-----------|-----------|-------|--------|--------|---------|----------|-----------|------------------------|-------|-------|-------|-------|-------|-------|-------|-------|-------|-------|-------|-------|-------|-------|-------|-------|-------|-------|-------|-------|-------|
|  | abs_ssrd                | 1.00     | 0.33      | 0.46     | -0.15     | 0.43     | 0.43     | 0.00      | -0.00     | 0.43  | -0.10  | -0.18  | -0.14   | -0.11    | -0.01     | -0.06                  | 0.02  | 0.01  | 0.01  | 0.03  | -0.01 | -0.05 | 0.00  | 0.00  | -0.04 | -0.52 | -0.03 | 0.22  | -0.02 | -0.17 | 0.04  | -0.11 | -0.12 | -0.23 | -0.14 | -0.16 | -0.09 |
|  | anom_ssrd               | -0.33    | 1.00      | -0.08    | -0.53     | 0.03     | 0.03     | 0.01      | -0.01     | -0.04 | -0.35  | -0.33  | -0.45   | -0.03    | -0.05     | -0.01                  | -0.00 | 0.01  | 0.03  | -0.01 | 0.00  | -0.00 | -0.01 | 0.00  | 0.01  | -0.04 | 0.02  | 0.02  | -0.05 | -0.01 | 0.05  | -0.06 | -0.36 | -0.08 | -0.41 | -0.03 | -0.26 |
|  | abs_strd                | -0.46    | -0.08     | 1.00     | 0.20      | 0.75     | 0.76     | -0.01     | 0.00      | 0.95  | 0.17   | 0.32   | -0.02   | -0.25    | 0.00      | -0.08                  | -0.01 | -0.01 | -0.04 | 0.04  | -0.04 | -0.07 | 0.00  | -0.01 | -0.01 | -0.73 | -0.05 | 0.69  | 0.01  | -0.61 | 0.00  | 0.40  | 0.06  | 0.17  | 0.03  | 0.20  | 0.02  |
|  | anom_strd               | -0.15    | -0.53     | 0.20     | 1.00      | -0.00    | -0.00    | -0.01     | -0.00     | 0.17  | 0.76   | 0.26   | 0.30    | -0.02    | -0.04     | -0.00                  | -0.01 | -0.07 | -0.20 | 0.02  | 0.00  | 0.00  | 0.01  | 0.02  | 0.01  | -0.02 | -0.09 | 0.02  | 0.07  | -0.02 | -0.09 | 0.04  | 0.22  | 0.04  | 0.21  | 0.02  | 0.13  |
|  | abs_sst1                | -0.43    | 0.03      | 0.75     | -0.00     | 1.00     | 0.94     | 0.06      | 0.01      | 0.73  | 0.01   | 0.06   | -0.05   | -0.30    | 0.02      | -0.14                  | 0.00  | 0.01  | 0.00  | 0.00  | -0.01 | -0.00 | -0.00 | -0.01 | 0.02  | -0.75 | 0.02  | 0.44  | -0.00 | -0.38 | 0.01  | 0.25  | 0.00  | -0.01 | -0.03 | 0.06  | -0.02 |
|  | abs_sst2                | -0.43    | 0.03      | 0.76     | -0.00     | 0.94     | 1.00     | 0.00      | 0.07      | 0.75  | 0.01   | 0.09   | -0.06   | -0.33    | 0.02      | -0.15                  | -0.02 | 0.01  | 0.00  | 0.00  | -0.01 | -0.01 | -0.01 | -0.01 | 0.01  | -0.73 | 0.01  | 0.47  | -0.00 | -0.42 | 0.01  | 0.26  | 0.00  | 0.04  | -0.02 | 0.10  | -0.02 |
|  | anom_sst1               | -0.00    | 0.01      | -0.01    | -0.01     | 0.06     | 0.00     | 1.00      | 0.10      | -0.01 | -0.01  | -0.01  | -0.00   | -0.01    | -0.01     | -0.00                  | 0.00  | 0.01  | 0.00  | -0.00 | 0.00  | -0.00 | -0.01 | -0.01 | -0.00 | 0.01  | 0.04  | -0.01 | -0.01 | 0.01  | 0.01  | -0.01 | -0.01 | -0.01 | -0.02 | -0.00 | -0.02 |
|  | anom_sst2               | -0.00    | -0.01     | 0.00     | -0.00     | 0.01     | 0.07     | 0.10      | 1.00      | 0.00  | 0.00   | 0.00   | 0.00    | -0.00    | -0.01     | 0.00                   | 0.00  | 0.01  | 0.01  | -0.01 | 0.02  | 0.00  | -0.00 | 0.01  | -0.02 | -0.00 | 0.00  | 0.00  | 0.01  | -0.00 | -0.00 | 0.00  | 0.01  | 0.00  | 0.00  | 0.00  | 0.00  |
|  | abs_q                   | -0.43    | -0.04     | 0.95     | 0.17      | 0.73     | 0.75     | -0.01     | 0.00      | 1.00  | 0.22   | 0.37   | -0.05   | -0.36    | -0.01     | -0.09                  | -0.02 | -0.02 | -0.04 | 0.04  | -0.04 | -0.08 | 0.00  | -0.01 | -0.01 | -0.71 | -0.07 | 0.77  | 0.03  | -0.69 | -0.01 | 0.49  | 0.06  | 0.29  | 0.05  | 0.31  | 0.03  |
|  | anom_q                  | -0.10    | -0.35     | 0.17     | 0.76      | 0.01     | 0.01     | -0.01     | 0.00      | 0.22  | 1.00   | 0.24   | 0.27    | -0.08    | -0.13     | -0.00                  | -0.01 | -0.09 | -0.17 | 0.02  | 0.00  | 0.01  | 0.01  | 0.03  | 0.01  | -0.02 | -0.06 | 0.04  | 0.15  | -0.04 | -0.13 | 0.06  | 0.22  | 0.08  | 0.32  | 0.05  | 0.23  |
|  | abs_tp                  | -0.18    | -0.33     | 0.32     | 0.26      | 0.06     | 0.09     | -0.01     | 0.00      | 0.37  | 0.24   | 1.00   | 0.45    | -0.18    | 0.04      | 0.01                   | 0.01  | -0.04 | -0.05 | 0.02  | -0.01 | -0.03 | 0.00  | -0.01 | -0.00 | -0.02 | -0.02 | 0.42  | 0.02  | -0.38 | -0.01 | 0.43  | 0.20  | 0.51  | 0.22  | 0.45  | 0.13  |
|  | anom_tp                 | -0.14    | -0.45     | -0.02    | 0.30      | -0.05    | -0.06    | -0.00     | 0.00      | -0.05 | 0.27   | 0.45   | 1.00    | 0.05     | 0.04      | 0.02                   | 0.00  | -0.03 | -0.06 | 0.01  | -0.00 | -0.00 | 0.00  | 0.00  | -0.00 | 0.06  | 0.01  | -0.10 | 0.02  | 0.09  | -0.01 | -0.04 | 0.22  | -0.03 | 0.29  | -0.06 | 0.20  |
|  | abs_wind                | -0.11    | -0.03     | -0.25    | -0.02     | -0.30    | -0.33    | -0.01     | -0.00     | -0.36 | -0.08  | -0.18  | 0.05    | 1.00     | 0.41      | 0.02                   | -0.08 | -0.08 | 0.01  | -0.00 | 0.01  | 0.01  | 0.01  | 0.01  | -0.00 | 0.15  | -0.01 | -0.36 | -0.01 | 0.37  | 0.00  | -0.30 | 0.00  | -0.35 | -0.01 | -0.39 | -0.01 |
|  | anom_wind               | -0.01    | -0.05     | 0.00     | -0.04     | 0.02     | 0.02     | -0.01     | -0.01     | -0.01 | -0.13  | 0.04   | 0.04    | 0.41     | 1.00      | -0.01                  | 0.00  | -0.17 | 0.03  | 0.00  | 0.00  | 0.00  | 0.01  | 0.02  | -0.00 | -0.01 | -0.01 | 0.01  | -0.02 | -0.01 | 0.01  | 0.01  | 0.02  | 0.01  | -0.01 | 0.01  | -0.01 |
|  | abs_sp_diff_meridional  | -0.06    | -0.01     | -0.08    | -0.00     | -0.14    | -0.15    | -0.00     | 0.00      | -0.09 | -0.00  | 0.01   | 0.02    | 0.02     | -0.01     | 1.00                   | 0.02  | 0.04  | -0.00 | 0.00  | -0.00 | -0.01 | -0.00 | -0.01 | -0.00 | 0.12  | -0.01 | -0.04 | 0.00  | 0.05  | -0.00 | 0.00  | 0.00  | -0.00 | 0.00  | -0.01 | 0.00  |
|  | abs_sp_diff_zonal       | -0.02    | -0.00     | -0.01    | -0.01     | 0.00     | -0.02    | 0.00      | 0.00      | -0.02 | -0.01  | 0.01   | 0.00    | -0.08    | 0.00      | 0.02                   | 1.00  | 0.00  | 0.02  | -0.00 | 0.00  | 0.00  | 0.00  | 0.00  | -0.00 | 0.03  | 0.00  | -0.03 | -0.00 | 0.02  | 0.00  | -0.04 | -0.00 | -0.01 | 0.00  | -0.00 | 0.00  |
|  | anom_sp_diff_meridional | -0.01    | 0.01      | -0.01    | -0.07     | 0.01     | 0.01     | 0.01      | 0.01      | -0.02 | -0.09  | -0.04  | -0.03   | -0.08    | -0.17     | 0.04                   | 0.00  | 1.00  | -0.03 | 0.00  | -0.01 | -0.01 | -0.03 | -0.07 | -0.01 | -0.00 | 0.04  | -0.01 | -0.03 | 0.01  | 0.04  | -0.00 | -0.02 | -0.01 | -0.04 | -0.01 | -0.02 |
|  | anom_sp_diff_zonal      | -0.01    | 0.03      | -0.04    | -0.20     | 0.00     | 0.00     | 0.00      | 0.01      | -0.04 | -0.17  | -0.05  | -0.06   | 0.01     | 0.03      | -0.00                  | 0.02  | -0.03 | 1.00  | -0.01 | 0.00  | 0.00  | -0.00 | -0.00 | -0.00 | 0.00  | 0.02  | -0.00 | -0.01 | -0.00 | 0.01  | -0.01 | -0.05 | 0.00  | 0.00  | 0.00  | 0.01  |
|  | enso                    | -0.03    | -0.01     | 0.04     | 0.02      | 0.00     | 0.00     | -0.00     | -0.01     | 0.04  | 0.02   | 0.02   | 0.01    | -0.00    | 0.00      | 0.00                   | -0.00 | 0.00  | -0.01 | 1.00  | 0.01  | -0.03 | -0.06 | -0.04 | 0.07  | -0.01 | -0.04 | 0.04  | 0.00  | -0.05 | 0.00  | 0.01  | 0.01  | 0.01  | 0.02  | 0.01  | 0.02  |
|  | mjo                     | -0.01    | 0.00      | -0.04    | 0.00      | -0.01    | -0.01    | 0.00      | 0.02      | -0.04 | 0.00   | -0.01  | -0.00   | 0.01     | 0.00      | -0.00                  | 0.00  | -0.01 | 0.00  | 0.01  | 1.00  | 0.07  | 0.03  | 0.01  | 0.10  | 0.03  | 0.02  | -0.04 | -0.01 | 0.05  | 0.01  | -0.01 | -0.00 | -0.01 | -0.01 | -0.01 | -0.01 |
|  | nao                     | -0.05    | -0.00     | -0.07    | 0.00      | -0.00    | -0.01    | -0.00     | 0.00      | -0.08 | 0.01   | -0.03  | -0.00   | 0.01     | 0.00      | -0.01                  | 0.00  | -0.01 | 0.00  | -0.03 | 0.07  | 1.00  | 0.06  | 0.55  | 0.01  | 0.04  | -0.01 | -0.08 | 0.01  | 0.09  | -0.01 | -0.03 | 0.00  | -0.01 | 0.00  | -0.01 | 0.00  |
|  | aao                     | -0.00    | -0.01     | 0.00     | 0.01      | -0.00    | -0.01    | -0.01     | -0.00     | 0.00  | 0.01   | 0.00   | 0.00    | 0.01     | 0.01      | -0.00                  | 0.00  | -0.03 | -0.00 | -0.06 | 0.03  | 0.06  | 1.00  | 0.10  | -0.02 | 0.02  | 0.01  | 0.00  | 0.00  | 0.00  | -0.01 | -0.00 | 0.00  | -0.00 | 0.01  | -0.00 | 0.00  |
|  | ao                      | -0.00    | 0.00      | -0.01    | 0.02      | -0.01    | -0.01    | -0.01     | 0.01      | -0.01 | 0.03   | -0.01  | 0.00    | 0.01     | 0.02      | -0.01                  | 0.00  | -0.07 | -0.00 | -0.04 | 0.01  | 0.55  | 0.10  | 1.00  | -0.18 | 0.01  | -0.02 | -0.02 | 0.01  | 0.02  | -0.01 | -0.02 | 0.01  | 0.00  | 0.01  | -0.00 | 0.01  |
|  | pna                     | -0.04    | 0.01      | -0.01    | 0.01      | 0.02     | 0.01     | -0.00     | -0.02     | -0.01 | 0.01   | -0.00  | -0.00   | -0.00    | -0.00     | -0.00                  | -0.00 | -0.01 | -0.00 | 0.07  | 0.10  | 0.01  | -0.02 | -0.18 | 1.00  | 0.01  | -0.02 | -0.01 | 0.00  | 0.01  | -0.01 | 0.00  | -0.00 | -0.01 | -0.00 | -0.01 |       |
|  | abs_snow                | -0.52    | -0.04     | -0.73    | -0.02     | -0.75    | -0.73    | 0.01      | -0.00     | -0.71 | -0.02  | -0.02  | 0.06    | 0.15     | -0.01     | 0.12                   | 0.03  | -0.00 | 0.00  | -0.01 | 0.03  | 0.04  | 0.02  | 0.01  | 0.01  | 1.00  | 0.24  | -0.50 | -0.02 | 0.44  | 0.03  | -0.21 | 0.01  | 0.06  | 0.03  | 0.01  | 0.01  |
|  | anom_snow               | -0.03    | 0.02      | -0.05    | -0.09     | 0.02     | 0.01     | 0.04      | 0.00      | -0.07 | -0.06  | -0.02  | 0.01    | -0.01    | -0.01     | -0.01                  | 0.00  | 0.04  | 0.02  | -0.04 | 0.02  | -0.01 | 0.01  | -0.02 | -0.02 | 0.24  | 1.00  | -0.13 | -0.12 | 0.18  | 0.26  | -0.07 | -0.01 | -0.05 | -0.03 | -0.05 | -0.03 |
|  | abs_evi                 | -0.22    | 0.02      | 0.69     | 0.02      | 0.44     | 0.47     | -0.01     | 0.00      | 0.77  | 0.04   | 0.42   | -0.10   | -0.36    | 0.01      | -0.04                  | -0.03 | -0.01 | -0.00 | 0.04  | -0.04 | -0.08 | 0.00  | -0.02 | -0.01 | -0.50 | -0.13 | 1.00  | 0.14  | -0.89 | -0.06 | 0.67  | 0.06  | 0.55  | 0.03  | 0.55  | 0.03  |
|  | anom_evi                | -0.02    | -0.05     | 0.01     | 0.07      | -0.00    | -0.00    | -0.01     | 0.01      | 0.03  | 0.15   | 0.02   | 0.02    | -0.01    | -0.02     | 0.00                   | -0.00 | -0.03 | -0.01 | 0.00  | -0.01 | 0.01  | 0.00  | 0.01  | 0.00  | -0.02 | -0.12 | 0.14  | 1.00  | -0.09 | -0.36 | 0.06  | 0.24  | 0.05  | 0.15  | 0.04  | 0.17  |
|  | abs_albedo              | -0.17    | -0.01     | -0.61    | -0.02     | -0.38    | -0.42    | 0.01      | -0.00     | -0.69 | -0.04  | -0.38  | 0.09    | 0.37     | -0.01     | 0.05                   | 0.02  | 0.01  | -0.00 | -0.05 | 0.05  | 0.09  | 0.00  | 0.02  | 0.01  | 0.44  | 0.18  | -0.89 | -0.09 | 1.00  | 0.15  | -0.60 | -0.04 | -0.54 | -0.04 | -0.55 | -0.04 |
|  | anom_albedo             | -0.04    | 0.05      | 0.00     | -0.09     | 0.01     | 0.01     | 0.01      | -0.00     | -0.01 | -0.13  | -0.01  | -0.01   | 0.00     | 0.01      | -0.00                  | 0.00  | 0.04  | 0.01  | 0.00  | 0.01  | -0.01 | -0.01 | -0.01 | -0.01 | 0.03  | 0.26  | -0.06 | -0.36 | 0.15  | 1.00  | -0.04 | -0.10 | -0.05 | -0.15 | -0.04 | -0.15 |
|  | abs_ef                  | -0.11    | -0.06     | 0.40     | 0.04      | 0.25     | 0.26     | -0.01     | 0.00      | 0.49  | 0.06   | 0.43   | -0.04   | -0.30    | 0.01      | 0.00                   | -0.04 | -0.00 | -0.01 | 0.01  | -0.01 | -0.03 | -0.00 | -0.02 | 0.00  | -0.21 | -0.07 | 0.67  | 0.06  | -0.60 | -0.04 | 1.00  | 0.24  | 0.53  | 0.06  | 0.49  | 0.03  |
|  | anom_ef                 | -0.12    | -0.36     | 0.06     | 0.22      | 0.00     | 0.00     | -0.01     | 0.01      | 0.06  | 0.22   | 0.20   | 0.22    | 0.00     | 0.02      | 0.00                   | -0.00 | -0.02 | -0.05 | 0.01  | -0.00 | 0.00  | 0.00  | 0.01  | -0.00 | 0.01  | -0.01 | 0.06  | 0.24  | -0.04 | -0.10 | 0.24  | 1.00  | 0.08  | 0.26  | 0.05  | 0.19  |
|  | abs_sm_surf             | -0.23    | -0.08     | 0.17     | 0.04      | -0.01    | 0.04     | -0.01     | 0.00      | 0.29  | 0.08   | 0.51   | -0.03   | -0.35    | 0.01      | -0.00                  | -0.01 | -0.01 | 0.00  | 0.01  | -0.01 | -0.01 | -0.00 | 0.00  | -0.01 | 0.06  | -0.05 | 0.55  | 0.05  | -0.54 | -0.05 | 0.53  | 0.08  | 1.00  | 0.22  | 0.96  | 0.18  |
|  | anom_sm_surf            | -0.14    | -0.41     | 0.03     | 0.21      | -0.03    | -0.02    | -0.02     | 0.00      | 0.05  | 0.32   | 0.22   | 0.29    | -0.01    | -0.01     | 0.00                   | 0.00  | -0.04 | 0.00  | 0.02  | -0.01 | 0.00  | 0.01  | 0.01  | -0.00 | 0.03  | -0.03 | 0.03  | 0.15  | -0.04 | -0.15 | 0.06  | 0.26  | 0.22  | 1.00  | 0.15  | 0.85  |
|  | abs_sm_deep             | -0.16    | -0.03     | 0.20     | 0.02      | 0.06     | 0.10     | -0.00     | 0.00      | 0.31  | 0.05   | 0.45   | -0.06   | -0.39    | 0.01      | -0.01                  | -0.00 | -0.01 | 0.00  | 0.01  | -0.01 | -0.01 | -0.00 | -0.00 | -0.01 | 0.01  | -0.05 | 0.55  | 0.04  | -0.55 | -0.04 | 0.49  | 0.05  | 0.96  | 0.15  | 1.00  | 0.16  |
|  | anom_sm_deep            | -0.09    | -0.26     | 0.02     | 0.13      | -0.02    | -0.02    | -0.02     | 0.00      | 0.03  | 0.23   | 0.13   | 0.20    | -0.01    | -0.01     | 0.00                   | 0.00  | -0.02 | 0.01  | 0.02  | -0.01 | 0.00  | 0.00  | 0.01  | -0.01 | 0.01  | -0.03 | 0.03  | 0.17  | -0.04 | -0.15 | 0.03  | 0.19  | 0.18  | 0.85  | 0.16  | 1.00  |
|  |                         | abs_ssrd | anom_ssrd | abs_strd | anom_strd | abs_sst1 | abs_sst2 | anom_sst1 | anom_sst2 | abs_q | anom_q | abs_tp | anom_tp | abs_wind | anom_wind | abs_sp_diff_meridional |       |       |       |       |       |       |       |       |       |       |       |       |       |       |       |       |       |       |       |       |       |
