# Supplementary material for: Exploring the relationship between temperature forecast errors and Earth system variables
Source: Copernicus journal article supplement (doi:10.5194/esd-13-1451-2022), 2022-10-28
Supplement: Supplementary file 2 [file esd-13-1451-2022-supplement.zip]

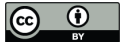

## *Supplement of*

# **Exploring the relationship between temperature forecast errors and Earth system variables**

**Melissa Ruiz-Vásquez et al.**

*Correspondence to:* Melissa Ruiz-Vásquez ([mruiz@bgc-jena.mpg.de](mailto:mruiz@bgc-jena.mpg.de))

- [esd-13-1451-2022-supplement-title-page.pdf](#)
- [Correlation\\_matrix.pdf](#)
- [Most\\_important\\_predictor\\_seasons\\_Week\\_3](#)
  - [Most\\_important\\_predictor\\_DJF\\_Week\\_3.nc](#)
  - [Most\\_important\\_predictor\\_JJA\\_Week\\_3.nc](#)
  - [Most\\_important\\_predictor\\_MAM\\_Week\\_3.nc](#)
  - [Most\\_important\\_predictor\\_SON\\_Week\\_3.nc](#)

The copyright of individual parts of the supplement might differ from the article licence.
